# Supplementary material
Source: Springer Nature journal article supplement (https://www.springermedizin.de/resource/supplementary/12986_2013_588_MOESM8_ESM.pdf/25655086)

saline

CL316,243

*p*PKA $\beta$ -actin**A**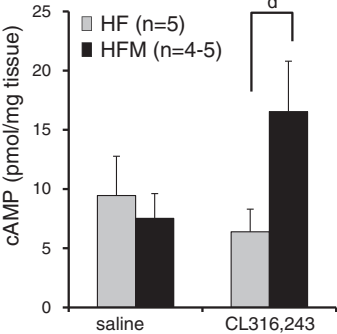**B**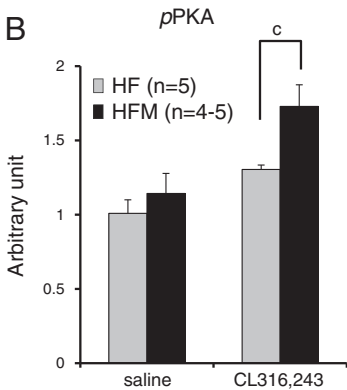

Supplement: MOESM8 [file 25655086]
